# Supplementary material for: Peritransplant glucocorticoids redistribute donor T cells to the bone marrow and prevent relapse after haploidentical SCT
Source: JCI journal article supplement (doi:10.1172/jci.insight.153551), 2021-10-12
Supplement: sd1 [file 1]

## **Supplemental Material**

### *Preparative regimen for glucocorticoid-based (GC) haplo-SCT*

For patients undergoing glucocorticoid-based (GC) haplo-SCT, the conditioning regimen consisted of fludarabine at 30 mg/m<sup>2</sup>/day for 6 days (days -9 to -4), melphalan at 70 mg/m<sup>2</sup>/day for 2 days (days -3 to -2) and rabbit anti-thymocyte globulin (ATG: thymoglobulin) at 1.25 mg/kg/day for 2 days (days -2 to -1), and total body irradiation at 3 Gy for 1 day (day 0). For the patients who had leukemia cells >10% in the PB and/or BM, cytarabine at 2 g/m<sup>2</sup> for 4 days (days -9 to -6) was added to the conditioning regimen. Peripheral blood stem cell (PBSC) mobilization using granulocyte colony stimulating factor was performed as described previously<sup>1</sup>. T-cell depletion was not performed. PBSCs were freshly transplanted on days 0 and +1. After transplantation, patients received G-CSF from day 5 to the day of neutrophil engraftment. GVHD prophylaxis consisted of methylprednisolone (mPSL) and tacrolimus. mPSL injection was started at a dose of 2 mg/kg on days -2 and -1 (on days of ATG administration), increased further to 500 mg/day on days of stem cell infusion (on days 0 and 1), and thereafter resumed at 1 mg/kg in divided doses twice a day. Dose reductions in mPSL were commenced on day 15 and undertaken rapidly until day 30 (the target dose on day 30 was 0.5 mg/kg/day). Continuous intravenous administration of tacrolimus was started at a dose of 0.02 mg/kg/day from day -2. The target blood concentration of tacrolimus was 8 – 12 ng/mL up to day 30, and thereafter tapered in the absence of acute GVHD. Patients received intravenous tacrolimus therapy until they could reliably receive oral medications after transplantation. Diagnosis and treatment of acute or chronic graft-versus-host disease, and supportive care were previously described<sup>1</sup>.

### *End points and definitions*

The primary end point was overall survival (OS), which was defined as time from transplantation to death from any cause. Relapse was defined as a recurrence or progression of underlying

hematologic malignant diseases. Patients who did not achieve a CR after allo-SCT were considered as having a relapse on day 1 in the analysis of relapse. Non-relapse mortality (NRM) was defined as death without relapse or disease progression. Observation times were censored at the date the patient was last seen alive in case the event of interest was not observed. Neutrophil recovery was defined as achieving absolute neutrophil count  $\geq 0.5 \times 10^9/L$  for 3 consecutive days, and platelet recovery defined as achieving platelet count  $\geq 2.0 \times 10^9/L$  for at least 7 days, unsupported by transfusion.

### *Statistical analysis of clinical data*

Continuous and categorical data are summarized as medians with ranges (minimums – maximums) and as frequencies with percentages, respectively. In our recent study, we showed that leukemic burden before transplantation was an independent risk factor for patients with AML who underwent allogeneic SCT in non-CR state<sup>2</sup>. Specifically, we reasonably categorized patients with AML who underwent allo-SCT in non-CR, into one of three groups according to leukemic burden, 1) BM blast  $\leq 20\%$  with the absence of PB blasts, 2) BM blast  $\leq 20\%$  with the presence of PB blasts, or  $20\% < \text{BM blast} \leq 60\%$ , or 3) BM blast  $> 60\%$ , referred to leukemic burden levels A, B, and C, respectively. In the multivariable Cox proportional-hazards model, continuous variables, such as patient age, were categorized into one of three groups for ease of interpretation,  $\geq 15$  to  $\leq 40$ ,  $> 40$  to  $\leq 50$ , or  $> 50$  to  $\leq 70$  under the hazard ratios of the categories. For the other categories, the patients were categorized into one of the following groups: donor-recipient sex combination (female donor to male recipient, versus all others), stem cell source GC-haplo-SCT versus PT-Cy-haplo-SCT), cytogenetics (good/ intermediate karyotype or poor karyotype), time interval from diagnosis to transplant ( $< 12$  months versus  $\geq 12$  months), HCT-CI (0 versus  $\geq 1$ ), and disease status (relapse 1, relapse 2, or PIF). As melphalan  $140 \text{ mg/m}^2$  used in our regimen was mid-intensity<sup>3</sup>, we excluded this variable from the prognostic factors for the multivariable Cox proportional-hazards model. The

cumulative incidence curves of neutrophil and platelet recovery, acute and chronic GVHDs, relapse, and NRM were estimated with the use of the cumulative incidence function, which accounted for competing risks in the following: for neutrophil or platelet recovery, NRM was a competing event; for acute or chronic GVHD, NRM and relapse were competing events; and for relapse, NRM was a competing event. The cumulative incidence curves were compared using Gray's test. Overall survival curves were depicted using Kaplan-Meier estimate with log-rank test. The impact of GVHD prophylaxis using either GC or PT-Cy on each of the outcomes, *i.e.*, relapse, NRM, neutrophil and platelet recovery, and acute and chronic GVHD, in which competing risks should be accounted, was evaluated with the use of a multivariable Fine and Gray proportional-hazards model<sup>4</sup> with adjustment for the same prognostic factors as in the multivariable Cox proportional-hazards model. All tests of significance were two-sided, and *p*-values less than .05 were considered significant. Statistical analyses were performed with EZR<sup>5,6</sup> which is a graphical user interface for R.

#### *Statistical analysis of pre-clinical data*

Statistical analysis was performed on Prism version 8.0 or 9.0 software (Graphpad Software). If the data was normally distributed, unpaired 2-tailed Student's t-test with Welch's modification was used to compare the two groups. Dunnett T3 test after one-way Welch's ANOVA was used for multiple test comparisons. For the data that was not normally distributed, Dunn's test after nonparametric Kruskal-Wallis test was used for multiple group comparisons or nonparametric Mann-Whitney U test (two-tailed) for comparisons of two groups. Survival curves were plotted using Kaplan-Meier estimates and compared by log-rank analysis. R software was used to analyze the survival curve where the leukemia death accounted for a competing risk in the GVHD mortality after transplantation. Data are presented as the mean  $\pm$  SEM and *P* < 0.05 considered significant. GraphPad Prism 8 was used for the generation of graphs and for statistical analysis. \*, *P* < 0.05; \*\*, *P* < 0.01; \*\*\*, *P* < 0.001; \*\*\*\*, *P* < 0.0001.

## References

1. Ogawa H, Ikegame K, Yoshihara S, et al. Unmanipulated HLA 2-3 antigen-mismatched (haploidentical) stem cell transplantation using nonmyeloablative conditioning. *Biol Blood Marrow Transplant.* 2006;12(10):1073-1084.
2. Ikegame K, Yoshida T, Yoshihara S, et al. Unmanipulated Haploidentical Reduced-Intensity Stem Cell Transplantation Using Fludarabine, Busulfan, Low-Dose Antithymocyte Globulin, and Steroids for Patients in Non-Complete Remission or at High Risk of Relapse: A Prospective Multicenter Phase I/II Study in Japan. *Biol Blood Marrow Transplant.* 2015;21(8):1495-1505.
3. Giralt S, Ballen K, Rizzo D, et al. Reduced-intensity conditioning regimen workshop: defining the dose spectrum. Report of a workshop convened by the center for international blood and marrow transplant research. *Biol Blood Marrow Transplant.* 2009;15(3):367-369.
4. Fine JP, Gray RJ. A Proportional Hazards Model for the Subdistribution of a Competing Risk. *Journal of the American Statistical Association.* 1999;94(446):496-509.
5. Kanda J. Scripts for TRUMP data analyses. Part II (HLA-related data): statistical analyses specific for hematopoietic stem cell transplantation. *Int J Hematol.* 2016;103(1):11-19.
6. Kanda Y. Investigation of the freely available easy-to-use software 'EZR' for medical statistics. *Bone Marrow Transplant.* 2013;48(3):452-458.

**Supplemental Table 1. Patients characteristics**

|                                |                                   | GC haplo          | PT-Cy haplo      |
|--------------------------------|-----------------------------------|-------------------|------------------|
| Number of patients             |                                   | 44                | 29               |
| Sex                            | male/female                       | 27/17             | 15/14            |
| Age (y)                        | median (range)                    | 53 (31-65)        | 49 (16-66)       |
| Disease status                 | primary induction failure         | 29                | 19               |
|                                | first relapse                     | 12                | 9                |
|                                | second relapse                    | 3                 | 1                |
| Donor                          | offspring                         | 31                | 13               |
|                                | sibling                           | 9                 | 11               |
|                                | parent                            | 1                 | 4                |
|                                | others                            | 3                 | 1                |
| HLA disparity in GVH direction | 1 antigen                         | 0                 | 2                |
|                                | 2 antigens                        | 24                | 14               |
|                                | 3 antigens                        | 20                | 13               |
| Karyotype                      | good                              | 4                 | 4                |
|                                | intermediate                      | 26                | 15               |
|                                | poor                              | 13                | 10               |
|                                | unknown                           | 1                 | 0                |
| HCT-CI                         | 0                                 | 18                | 13               |
|                                | 1                                 | 4                 | 5                |
|                                | 2≤                                | 22                | 11               |
| Conditioning regimen           | Flu+(CA)+L-PAM<br>+TBI(3)+ATG     | 44                | 0                |
|                                | Flu+BU+TBI±others                 | 0                 | 19               |
|                                | Flu+TBI                           | 0                 | 4                |
|                                | Flu+BU+CA+ATG                     | 0                 | 5                |
|                                | others                            | 0                 | 1                |
| GVHD prophylaxis               | Tac+mPSL                          | 44                | 0                |
|                                | Tac+MMF                           | 0                 | 17               |
|                                | CSP+MMF                           | 0                 | 3                |
|                                | Tac±MTX                           | 0                 | 8                |
|                                | MMF                               | 0                 | 1                |
| Stem cell                      | BM                                | 0                 | 0                |
|                                | PB                                | 44                | 29               |
| Leukemic burden                | CD34 cells (x10 <sup>6</sup> /kg) | 6.08 (1.91-11.56) | 2.53 (0.14-5.86) |
|                                | <sup>a</sup> Level A              | 7 (15.6)          | 6 (20.7)         |
|                                | <sup>b</sup> Level B              | 15 (34.1)         | 11 (37.9)        |
|                                | <sup>c</sup> Level C              | 22 (50.0)         | 12 (41.4)        |
| Blast (%) in the BM            | median (range)                    | 44.1 (0-93)       | 36.8 (0-95)      |
| Blast (%) in the PB            | median (range)                    | 22.8 (0-99)       | 7.0 (0-90)       |

<sup>a</sup>Level A, BM blast ≤ 20% and the absence of PB blasts; <sup>b</sup>Level B, BM blast ≤ 20% and the presence of PB blasts or 20% < BM blast ≤ 60%; <sup>c</sup>Level C, BM blast > 60%

**Supplemental Table 2. Multivariable analysis of outcome**

|                       | GC haplo (versus PT-Cy haplo) |                 |
|-----------------------|-------------------------------|-----------------|
|                       | HR (95%CI)                    | <i>p</i> -value |
| Relapse               | 0.279 (0.121-0.645)           | 0.003           |
| Non-relapse mortality | 3.797 (0.581-24.800)          | 0.160           |
| Acute GVHD            | 3.192 (1.019-9.994)           | 0.046           |
| Chronic GVHD          | 3.315 (0.420-2.618)           | 0.260           |
| Neutrophil recovery   | 11.170 (5.480-22.760)         | < 0.001         |
| Platelet recovery     | 5.178 (2.750-9.753)           | < 0.001         |

**Supplemental Table 3. Multivariable analysis for mortality**

| Overall mortality                          |                      |                 |
|--------------------------------------------|----------------------|-----------------|
| Variables                                  | HR (95%CI)           | <i>p</i> -value |
| Leukemic burden                            |                      |                 |
| Level A <sup>a</sup>                       | 1.00                 |                 |
| Level B <sup>b</sup>                       | 0.869 (0.307-2.459)  | 0.791           |
| Level C <sup>c</sup>                       | 0.473 (0.153-1.466)  | 0.195           |
| Donor-recipient sex combination            |                      |                 |
| All other                                  | 1.00                 |                 |
| Female donor, male recipient               | 0.508 (0.190-1.361)  | 0.178           |
| GVHD prophylaxis                           |                      |                 |
| PT-Cy haplo                                | 1.00                 |                 |
| GC haplo                                   | 0.376 (0.148-0.960)  | 0.041           |
| Cytogenetics                               |                      |                 |
| Good/Intermediate                          | 1.00                 |                 |
| Poor                                       | 1.392 (0.568-3.409)  | 0.470           |
| Recipient age (years)                      |                      |                 |
| 15-40                                      | 1.00                 |                 |
| 41-50                                      | 1.512 (0.366-6.246)  | 0.568           |
| 51-70                                      | 2.823 (0.850-9.376)  | 0.090           |
| HCT-CI                                     |                      |                 |
| 1 ≤                                        | 1.00                 |                 |
| 0                                          | 1.370 (0.614-3.060)  | 0.442           |
| Time interval from diagnosis to transplant |                      |                 |
| ≥ 12 months                                | 1.00                 |                 |
| < 12 months                                | 1.308 (0.357-4.794)  | 0.686           |
| Disease status                             |                      |                 |
| PIF                                        | 1.00                 |                 |
| First relapse                              | 1.169 (0.398-3.434)  | 0.776           |
| Second relapse                             | 4.370 (0.723-26.430) | 0.108           |
| Years at allo-SCT                          | 0.951 (0.734-1.233)  | 0.706           |

Abbreviations: HR, hazard ratio

<sup>a</sup>Level A, BM blast ≤ 20% and the absence of PB blasts; <sup>b</sup>Level B, BM blast ≤ 20% and the presence of PB blasts or 20% < BM blast ≤ 60%; <sup>c</sup>Level C, BM blast > 60%

**Supplemental Table 4. Antibodies and staining dyes**

| Antigen                                 | Conjugated fluorochrome | Clone         | Catalog number | Supplier       |
|-----------------------------------------|-------------------------|---------------|----------------|----------------|
| <b>Intracellular staining</b>           |                         |               |                |                |
| active Caspase 3                        | PE                      | C92-605       | 550821         | BD Biosciences |
| Caspase 8 (CaspGLOW kit)                | FITC                    |               | 88-7005        | Thermo Fisher  |
| Ki67                                    | APC                     | 16A8          | 652405         | BioLegend      |
| CXCL-12                                 | FITC                    | 79018         | IC350F         | R&D Systems    |
| <b>Surface staining</b>                 |                         |               |                |                |
| CD3e                                    | PECy7                   | 145-2C11      | 100320         | Biolegend      |
| CD4                                     | APC                     | RM4-5         | 553051         | BD Biosciences |
| CD4                                     | AF700                   | GK1.5         | 100430         | Biolegend      |
| CD8a                                    | BV711                   | 53-6.7        | 100748         | Biolegend      |
| CD8a                                    | BV650                   | 53-6.7        | 100742         | Biolegend      |
| CD8a                                    | PB                      | 53-6.7        | 100725         | Biolegend      |
| CD90.1                                  | APCeFluor780            | HIS51         | 47-0900-82     | eBioscience    |
| CD90.2                                  | BV605                   | 53-2.1        | 140318         | Biolegend      |
| TCR $\beta$                             | FITC                    | H57-597       | 109206         | Biolegend      |
| CD44                                    | APCCy7                  | IM7           | 560568         | BD Biosciences |
| CD62L                                   | BV480                   | MEL-14        | 746726         | BD Bioscience  |
| CD103                                   | PE                      | M290          | 557495         | BD Biosciences |
| CD103                                   | BV421                   | M290          | 562771         | BD Bioscience  |
| CXCR4                                   | PerCPCy5.5              | L276F12       | 146510         | Biolegend      |
| $\alpha$ 4 $\beta$ 7 integrin           | PE                      | DATK32        | 120606         | Biolegend      |
| $\alpha$ 4 integrin (CD49d)             | PEdazzle594             | R1-2          | 103626         | Biolegend      |
| $\beta$ 1 integrin (CD29)               | BV650                   | HM b1-1       | 740500         | BD Bioscience  |
| VCAM-1 (CD106)                          | PE                      | 429 (MVCAM.A) | 105714         | Biolegend      |
| V $\alpha$ 2 TCR                        | APCCy7                  | B20.1         | 127818         | Biolegend      |
| V $\beta$ 6 TCR                         | FITC                    | RR4-7         | 553193         | BD Bioscience  |
| I-A/I-E                                 | FITC                    | M5/114.15.2   | 107606         | Biolegend      |
| I-A/I-E                                 | PB                      | M5/114.15.2   | 107620         | Biolegend      |
| CD64                                    | PECy7                   | X54-5/7.1     | 139314         | Biolegend      |
| CD11c                                   | APCCy7                  | N418          | 117324         | Biolegend      |
| YAc                                     | Biotin                  | eBioY-Ae      | 13-5741-85     | eBioscience    |
| Streptavidin                            | BV421                   |               | 405226         | Biolegend      |
| Streptavidin                            | BV605                   |               | 405229         | Biolegend      |
| Ly6C                                    | PEdazzle594             | AL-21         | 128044         | Biolegend      |
| Ly6G                                    | Biotin                  | 1A8           | 127604         | Biolegend      |
| CD31                                    | PeCy7                   | MEC13.3       | 102524         | Biolegend      |
| Ter119                                  | APC                     | Ter119        | 116212         | Biolegend      |
| Sca-1                                   | BV421                   | D7            | 108128         | Biolegend      |
| CD16/32                                 | purified                | 2.4G2         | 553142         | BD Bioscience  |
| CD45                                    | PE                      | 30-F11        | 103106         | Biolegend      |
| CD45.1                                  | FITC                    | A20           | 110706         | Biolegend      |
| CD45.1                                  | AF700                   | A20           | 110724         | Biolegend      |
| CD45.1                                  | PECy7                   | A20           | 110730         | Biolegend      |
| CD45.2                                  | FITC                    | 104           | 109806         | Biolegend      |
| CD45.2                                  | APC                     | 104           | 109804         | Biolegend      |
| CD326 (EpcAM)                           | AF647                   | G8.8          | 118212         | Biolegend      |
| H2Dd                                    | PE                      | 34-2-12       | 110608         | Biolegend      |
| H2Dd                                    | AF647                   | 34-2-12       | 110612         | Biolegend      |
| H2Kd                                    | AF700                   | SF1-1.1       | 116628         | Biolegend      |
| <b>Staining dye</b>                     |                         |               |                |                |
| Zombie Aqua™ Fixable Viability Kit      |                         |               | 423102         | BioLegend      |
| Zombie NIR™ Fixable Viability Kit       |                         |               | 77184          | BioLegend      |
| 7AAD                                    |                         |               | A9400          | Sigma-Aldrich  |
| Violet dye cell trace proliferation kit |                         |               | C34557         | BioLegend      |
| Hoechst 33342                           |                         |               | 561908         | BD Biosciences |



## Supplementary Figures

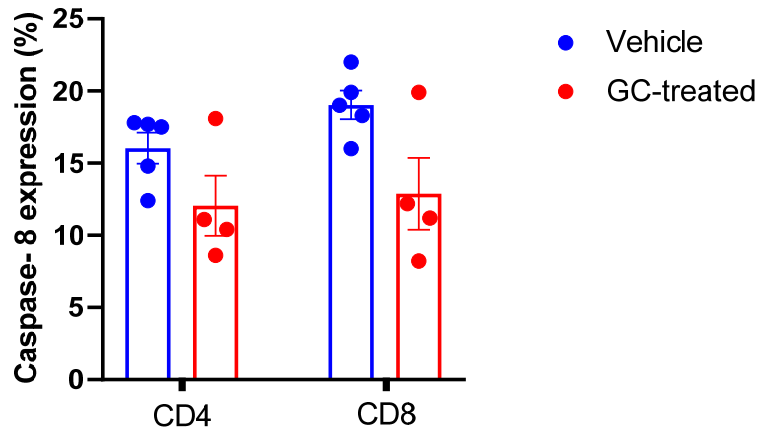

**Supplemental Figure 1. Caspase-8 expression of polyclonal donor T cells in mLN at day 5 after SCT.** Caspase 8 was quantified in donor T cells within mLN 5 days after SCT by flow cytometry.

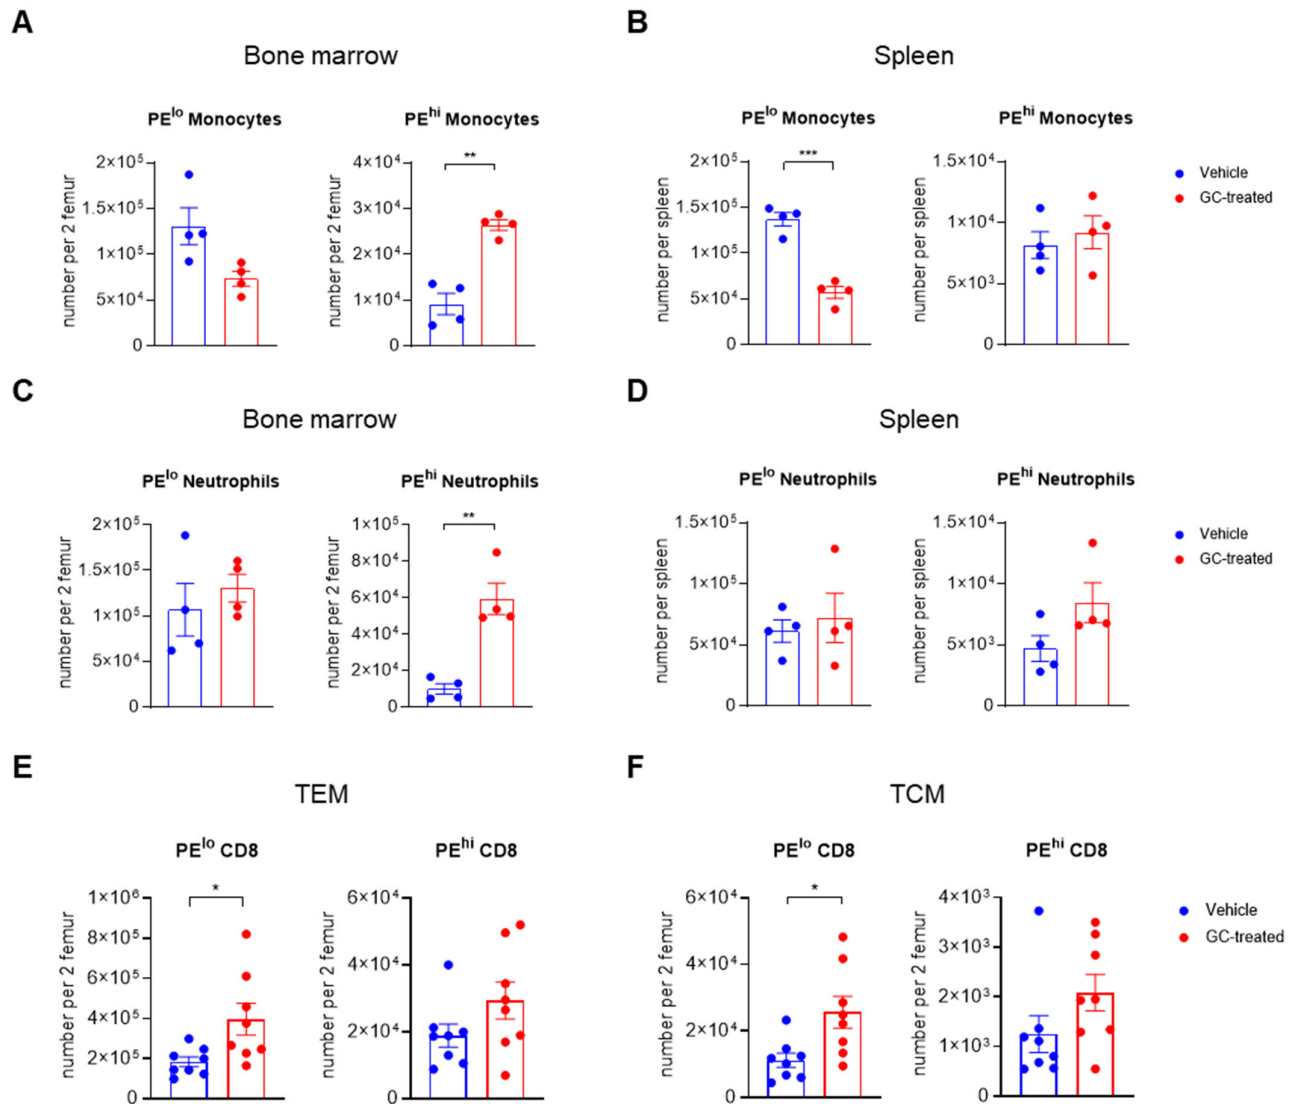

**Supplemental Figure 2. Effect of glucocorticoids on cell migration.** Recipient mice were injected with PE conjugated anti-CD45 antibody (PE) 5 min before euthanasia. At day 5 after BMT, the absolute numbers of CD45.1<sup>+</sup>CD45.2<sup>neg</sup> resident (PE<sup>neg</sup>) and circulatory (PE<sup>+</sup>) Ly6C<sup>+</sup> monocytes (**A – B**) or Ly6G<sup>+</sup> neutrophils (**C – D**) were quantified in the BM (**A, C**) and spleen (**B, D**) (n = 4 – 5 per group). (**E – F**) The absolute numbers of resident (PE<sup>low</sup>) and circulatory (PE<sup>high</sup>) CD8 T cells with (**E**) CD44<sup>+</sup>CD62L<sup>neg</sup> TEM and (**F**) CD44<sup>+</sup>CD62L<sup>+</sup> TCM phenotypes in the bone marrow 27 days after BMT (n = 7 – 8 per group). Data are presented as mean ± SEM. \*P < .05; \*\*P < .01; \*\*\*P < .001.

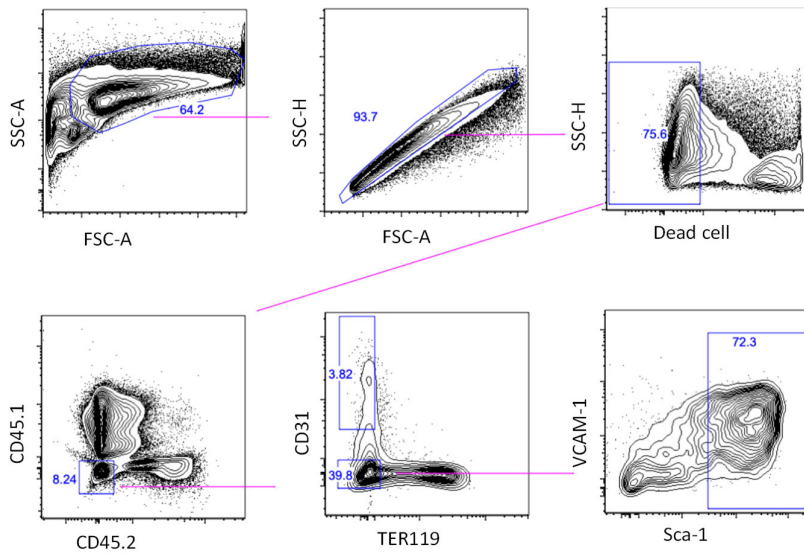

**Supplemental Figure 3. Gating of bone marrow stroma.** Representative gating strategy for the expressions of  $CD31^{+}TER119^{neg}$  endothelial cells and  $CD45^{neg}CD31^{neg}TER119^{neg}Sca-1^{+}$  mesenchymal stromal cells (MSCs) in the BM at day 5 after BMT.

**A**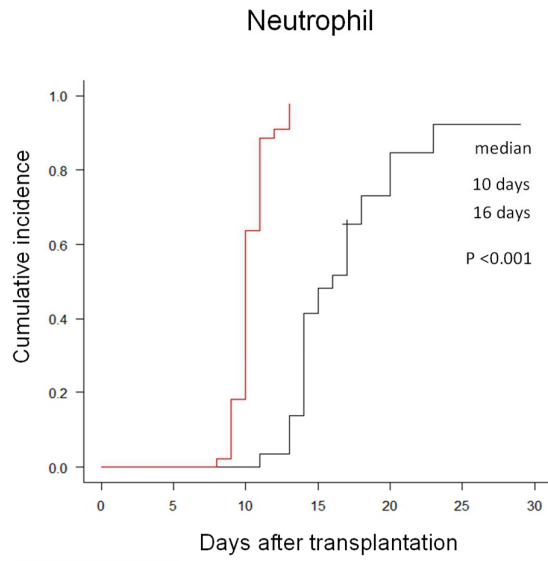**B**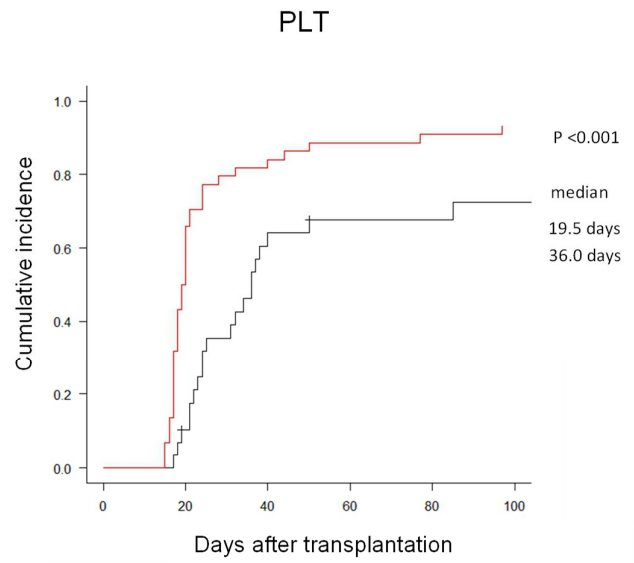

**Supplemental Figure 4. Time to engraftment.** Donor engraftment of (A) neutrophils and (B) platelets after haploidentical SCT (red = glucocorticoid-treated, black = PT-Cy).
